1 Stability of microbiota in vineyard soils across consecutive years.

2

3 Alessandro Cestaro<sup>a#</sup>, Emanuela Coller<sup>b</sup>, Davide Albanese<sup>a</sup>, Erika Stefani<sup>a</sup>, Massimo

4 Pindo<sup>a</sup>, Cludio Ioriatti<sup>c</sup>, Roberto Zanzotti<sup>c</sup>, Caludio Donati<sup>a</sup>.

5

6 <sup>a</sup> Research and Innovation Centre, Fondazione Edmund Mach, Italy.

7 <sup>b</sup> Department of Chemistry, Life Sciences and Environmental Sustainability, University of

8 Parma, Italy.

9 <sup>c</sup> Technology Transfer Center, Fondazione Edmund Mach, Italy.

10

11 Running Head: Agricultural soils, soil microbiota, temporal stability

12

13 # Address correspondence to A. Cestaro, [alessandro.cestaro@fmach.it](mailto:alessandro.cestaro@fmach.it)

14

## 15 Abstract

16 Agricultural soils harbor rich and diverse microbial communities that have a deep  
17 influence on soil properties and productivity. Large scale studies have shown the impact  
18 of environmental parameters like climate or chemical composition on the distribution of  
19 bacterial and fungal species. Comparatively, little data exists documenting how soil  
20 microbial communities change between different years. Quantifying the temporal  
21 stability of soil microbial communities will allow us to better understand the relevance of  
22 the differences between environments and their impact on ecological processes on the  
23 global and local scale.

24 We characterized the bacterial and fungal components of the soil microbiota in ten  
25 vineyards in two consecutive years. Despite differences of species richness and  
26 diversity between the two years, we found a general stability of the taxonomic structure  
27 of the soil microbiota. Temporal differences were smaller than differences due to  
28 geographical location, vineyard land management or differences between sampling  
29 sites within the same vineyard. Using machine learning, we demonstrated that each site  
30 was characterized by a distinctive microbiota, and we identified a reduced set of  
31 indicator species that could classify samples according to their geographic origin across  
32 different years with high accuracy.

33

### 34 Importance

35 The temporal stability of the soil microbiota is important to understand the relevance of  
36 the differences that are found in response to a variety of environmental factors. By

37 comparing fungal and bacterial microbiota from samples collected in the same sites in  
38 two consecutive years, we found a remarkable stability of both components, with  
39 characteristic differences between bacteria and fungi. Our work fills an important gap  
40 toward the definition of a microbial cartography of agricultural soils.

## 41 Introduction

42 Soils are colonized by complex and still poorly characterized microbial communities,  
43 that constitute a large fraction of the Earth biomass [1], [2]. Thanks to recent  
44 technological advancements, cultivation-free approaches have provided a first picture of  
45 the diversity of the soil microbiota, although significant knowledge gaps still exist [3], [4].  
46 These studies have shown that soil, together with the plant rhizosphere, is host to the  
47 most diverse amongst free living and host-associated microbial communities [5].  
48 A large amount of work has been devoted to the understanding of the ecological factors  
49 that drive the composition of soil microbial communities and global scale studies have  
50 shown that a relatively small number of ubiquitous taxa dominate the bacterial  
51 component of the soil microbiota [6], [7]. Studies on the global distribution of fungal  
52 communities show significant diversity that correlate with geography, while a small  
53 number of generalist fungal taxa are widespread in the global soil fungal communities  
54 [8], [9]. Niche differentiation of soil bacterial and fungal communities is associated with a  
55 combination of geographical and environmental variables that often influence their  
56 diversity in a contrasting way [3].  
57 Metagenomic characterization of soil microbial communities have received special  
58 attention in the context of grape cultivation and wine making [10]. The distinct sensory  
59 characteristics that distinguish wines from different regions are the product of a large  
60 number of physical and biological factors; amongst these, several studies have  
61 documented the role of soil microbial communities [11][12] in determining the microbial  
62 contribution to the regional differentiation of wine, in an attempt to define a microbial

63 “Terroir” and how this is influenced by climatic and geographic factors, and  
64 management [13], [14]. Despite the fact that, in order to define a microbial contribution  
65 to regional characteristics of cultures such as wine, the dynamics of soil microbiota over  
66 extended periods of time must be limited compared to differences due to other  
67 environmental variables, like, *e.g.* location, climate, or soil chemical characteristics, few  
68 studies have addressed the stability of soil microbial communities over time [1]. Studies  
69 tracking the variations of soil bacterial communities in different seasons within one year  
70 have shown that bacterial communities vary more across land uses than time [15,16].  
71 However, despite the community modifications due to the seasonal changes and / or  
72 due to the plant growth cycle, few data are available regarding the stability of bacterial  
73 and fungal communities colonizing soil over consecutive years and how variations  
74 between years compare to the variability induced by land management or geographic  
75 location [17][18][19] .

76 In a previous work, we have used a metabarcoding approach to characterize the  
77 bacterial and fungal microbiota of vineyard soils in the Italian Trentino region, finding  
78 that land use and location concurrently shape the soil microbiota, with characteristic  
79 differences between the bacterial and fungal components [20]. Here, we examine in  
80 depth the stability of the soil microbiome across two consecutive years. We show that in  
81 both bacterial and fungal communities the variability between the two years is  
82 significantly smaller than that related to locations and land use. The majority of bacterial  
83 species in each site was present in both years, that differ mainly in the  
84 presence/absence of rare taxa. For fungi, we found that in each site a large fraction of  
85 taxa with high abundance were present only in one of the two sampling years. Using

86 machine learning we found that a predictor trained on the distribution of taxa in 2017  
87 could classify 2018 samples according to their origin both for bacteria and fungi,  
88 showing that both components of the microbiota are highly associated with the  
89 geographical origin of the soil.

90

91

## 92 Results

93 After preprocessing and filtering we obtained 10,924,706 16S V4 sequences and  
94 14,672,492 ITS1 sequences, respectively, that were denoised into 30,869 SVs for  
95 bacteria and 14,099 SVs for fungi. The samples were rarefied to 15,000 reads per  
96 sample, both for Bacteria and Fungi, obtaining a dataset of 5,220,000 reads and 30,815  
97 SVs from 348 samples for 16S and 5,115,000 reads and 14,021 SVs from 341 samples  
98 for ITS.

99 We compared the relative abundances of SVs across samples collected in the same  
100 sampling sites in 10 vineyards from 4 different locations situated in the Adige valley in  
101 the northern Italian region Trentino [20]. In each vineyard, 6 soil samples were collected  
102 between May 4th and May 18th, 2017, and between May 7th and May 24th, 2018, in 3  
103 sampling points, namely between the rows (V) and in the perennial crop area at a  
104 distance of 8 (P1) and 16 (P2) meters from the border of the vineyard in each of the two  
105 consecutive sampling years. Comparing the meteorological data from 4 meteorological  
106 stations located in close proximity of the vineyards, we found that 2018 was  
107 characterized by a higher amount of accumulated rain than 2017 (Supplementary

108 Figure S2).

## 109 Diversity and Richness of soil microbiota in two consecutive years

110 Although most taxa had significant shifts in their relative abundance, we found a general  
111 stability of the overall structure of the bacterial microbiota at high taxonomic levels  
112 (Figure 1a). In both years the most abundant Phylum was Acidobacteria, followed by  
113 Proteobacteria in 2017 and Actinobacteria in 2018. The different proportions of  
114 Proteobacteria and Actinobacteria was the only major difference between the two  
115 consecutive years at the Phylum level. At the Family level, the most abundant in both  
116 years were *Gp6*, followed by *Nitrososphaeraceae* and *Planctomycetaceae*  
117 (Supplementary Figure S3a). The stability of the bacterial component of the microbiota  
118 between the two years was evident by comparing the relative abundance of each  
119 Genus separately in each site (Fig. 1b). Confirming the results at the Phylum level,  
120 Genuses of the Phyla *Actinobacteria* and *Thaumarcheota* clustered above the diagonal,  
121 while Genuses of the Phylum *Proteobacteria* were more numerous below the diagonal.  
122 For fungi (Figure 1c), we found that in both years the dominant component of the  
123 microbiome was represented by *Ascomycota*, that accounted for more than 50% of the  
124 soil mycobiota, followed by *Zygomycota* and *Basidiomycota*. At the Family level, the  
125 most abundant in both years were *Mortierellaceae* followed by *Nectriaceae* and a family  
126 of unidentified *Ascomycota* (Supplementary Figure S3b). However, the degree of  
127 correlation between 2017 and 2018 relative abundances at the Genus level was lower  
128 than in Bacteria, as shown by the more dispersed distribution in Fig. 1d.  
129 To characterize the changes in the structure of the soil microbiome between the two

130 years, we compared the diversity and richness of the microbial populations separately  
131 for Bacteria and Archaea and for Fungi in both years for each location and land  
132 management using the Chao1 estimator of the number of SVs present in the sample,  
133 the Shannon entropy, the Simpson index of diversity and Faith's phylogenetic diversity  
134 (Figure 2 and Supplementary Figure S2).

135

136 Bacteria and Archaea

137 Using a generalized linear model that accounts for differences between locations and  
138 land management (see Methods and Supplementary Materials), we found that the  
139 Chao1 estimator and Faith's phylogenetic diversity were significantly higher in 2018  
140 compared to 2017 ( $p$ -value  $< 2e-16$  for both), while Simpson index was  
141 significantly lower in 2018 ( $p$ -value= $9.26e-4$ ) and there was no significant difference in  
142 Shannon entropy. These results were confirmed by a pair-wise comparison of the 168  
143 sites for which we had samples both in 2017 and 2018 ( $p$ -value  $< 2.2e-16$  for Chao1,  $<$   
144  $2.2e-16$  for Faith's PD, and  $2.47e-05$  for Simpson index, respectively, one-tailed paired  
145 Wilcoxon rank-sum test). Again, the differences in the Shannon entropy between the  
146 two years were not significant.

147

148 The consistently higher value of the Chao1 estimator of species richness and of Faith's  
149 phylogenetic diversity across all sites suggests that in each site there was a higher  
150 number of SVs that were present only in 2018 samples than of SVs that were present  
151 only in 2017 samples. To test this hypothesis, we computed, for each sampling site, the  
152 number of SVs that were specific to one of the two years and of those that were present



153 in both (Figure 3a). We found that in most cases there was a higher number of SVs that  
154 were present only in 2018 than of SVs that were specific to 2017 (Supplementary Table  
155 4). However, the year-specific SVs had a much lower relative abundance than SVs that  
156 were present in both years (Figure 3a), showing that the higher richness of 2018  
157 samples was mainly due to rare taxa, i.e. to taxa that are present with a low number of  
158 individuals in each sample. Concerning the taxonomic distribution of year-specific and  
159 shared SVs ( Figure 3b), we found that *Acidobacteria* and *Actinobacteria*, the two Phyla  
160 with the highest relative abundances (Figure 1a), had a higher number of taxa that were  
161 shared between the two years than of year-specific taxa, while the number of year-  
162 specific SVs was similar to the number of shared SVs for *Proteobacteria*, and higher  
163 than the number of shared SVs for *Planctomycetales* and *Bacteroidetes*. *Proteobacteria*  
164 was the phylum with the highest number of SVs that were present only in one of the two  
165 years in any given sampling site.

## 166 Fungi

167 As for Bacteria, we compared the alpha diversity of fungal communities using a  
168 generalized linear model that accounts for differences between locations and land  
169 management. We found that the Chao1 estimator of species richness was not  
170 statistically different between the two years while we found a significantly higher Faith's  
171 phylogenetic diversity, although with high p-value (p-value=0.04924). These results  
172 were probably due to inconsistent variations across the different locations (Figure 2b).  
173 Indeed, while there were locations in which samples from 2018 had consistently higher  
174 Chao1 estimators for alpha diversity and Faith's phylogenetic diversity across land  
175 management (e.g. PT12), in other cases the reverse was true, i.e. the Chao1 estimator

176 of alpha diversity and Faith's phylogenetic diversity of samples from 2018 were  
177 consistently lower than for 2017 across land management (e.g. PT16). On the other  
178 hand, we found that both the Shannon entropy and Simpson diversity index were higher  
179 in 2018 compared to 2017 ( $p$ -value  $<2e-16$  and  $2.06e-3$ , respectively). A pairwise  
180 comparison of the 161 sampling sites that, after rarefaction, had samples both in 2017  
181 and 2018 confirmed that the increase of both Shannon entropy and Simpson diversity  
182 index was significant ( $p$ -value  $3.7e-15$  and  $2.8e-08$ , respectively, one-tailed paired  
183 Wilcoxon rank-sum test).

184 Another striking difference between the fungal and bacterial component of the soil  
185 microbiome was evident by comparing the distribution of the abundances of the year-  
186 specific SVs (Figure 3c). In fungi, the SVs that were present only in one of the two years  
187 in each sampling site had a distribution of relative abundances that was similar to that of  
188 SVs that were conserved across years, including not only rare taxa, but also taxa with  
189 high relative abundances (Figure 3c), while in bacteria SVs present only in one of the  
190 sampling years included only SVs with a low relative abundance (Figure 3a). The  
191 taxonomic distribution of the year-specific and shared SVs (Figure 3d) showed that the  
192 Phylum *Ascomycota* had, in both years, a number of year-specific SVs that was  
193 comparable to the number of SVs that were present in both years, while the Phylum  
194 *Basidiomycota* was dominated by year-specific SVs. Interestingly, we found that in 2018  
195 there was a general increase of the number of SVs from the Phylum *Glomeromycota*  
196 (Figure 3d). Indeed, the number of SVs from this Phylum that were specific to 2018 was  
197 higher both than the number of SVs specific to 2017 and the number of SVs that were  
198 present in both years.

199 Soil microbiota maintain distinctive, site-specific characteristics  
200 across times.

201 In order to characterize the relative importance of sampling site, location, land  
202 management and year of sampling to determine the differences between the samples,  
203 we computed the Bray-Curtis dissimilarity amongst all samples for Bacteria and Fungi.  
204 A PcoA analysis (Figure 4a) shows that while the different years induced some  
205 variability amongst the samples both for Bacteria and Fungi, samples still grouped  
206 according to location, suggesting that the variability between two consecutive years  
207 was comparable to the variability between the different samples from the same location  
208 and land management.

209

210 To quantify the relative importance of the different factors of the experimental design,  
211 namely sampling site, location, land management and year to determine the  
212 differentiation of the soil microbiota, we compared the distributions of the Bray-Curtis  
213 dissimilarities between pairs of samples where only one of the factors was varied, while  
214 all the other were held constant. The comparisons were between: i) samples from the  
215 same location, sampling site (and thus land management) and different year; ii)  
216 samples from the same location, year and different land management; iii) samples from  
217 the same land management, year, and different locations. These were compared with  
218 the dissimilarities between technical replicates. For both Bacteria and Fungi (Figure 5),  
219 the factors determining dissimilarity were, in growing order of importance, sampling site,  
220 year of sampling, land management and sampling location. All differences were  
221 statistically significant (Supplementary Table 4).

222 We used a Machine Learning approach to verify if the structure of the soil microbiota of  
223 each location maintained a set of organisms that distinguished it from the other  
224 locations and if these characteristic organisms were stable across different years.  
225 Specifically, we trained a set of classifiers based on Support Vector Machines that used  
226 the relative abundances of Bacteria and Fungi, respectively, to predict the location  
227 where a given sample had been collected. Using a cross-validation approach on 2017  
228 data, we estimated that the mean expected Classification Accuracy (CA) was 0.989  
229 (SD=0.0155; median 1.00) for Bacteria and 0.951 (SD=0.0267; median 0.948) for Fungi.  
230 We then trained one classification model for Bacteria and one for Fungi using all 2017  
231 data, and used these models to predict location provenance of 2018 samples. We found  
232 that the CA of the 2018 samples was 1.0 for Bacteria and 0.96 for Fungi, showing that  
233 soil microbiota is highly associated with sampling location and that this association is  
234 stable over time.

235

236 In order to identify a reduced set of site-specific SVs that could be used to classify the  
237 samples according to their origin across different years, we used a three step  
238 procedure: i) first, we used the coefficients of the 2017 SVM models to rank the SVs in  
239 order of importance according to their contribution to the site classifier; ii) next, including  
240 the SV starting from the most relevant, we estimated how the CA depended on the  
241 number of included SVs using a cross-validation approach on the 2017 samples; iii)  
242 third, we used the same reduced set of SVs to predict the provenance of the 2018  
243 samples using predictors trained on the 2017 samples. Using this procedure, we  
244 defined the set of SVs that characterize a given site as the minimal set for which the CA

245 for the 2018 samples predicted using 2017 data exceeded the 25th percentile of the  
246 cross-validation expected CA. The 2017 expected CA (step ii), Figure 5) monotonically  
247 increased as a function of the number of included SVs to a mean value of 0.984  
248 (median 0.983) for Bacteria and 0.93 (median 0.931) for Fungi using 40 SVs per site.  
249 The CA for 2018 samples was lower than the 2017 expected CA for the lower values of  
250 the number of included SVs, and exceeded the 25th percentile of the expected CA  
251 when more than 15 SVs per site were used for Bacteria, and 10 for Fungi. These were  
252 the minimal set of Bacterial or Fungal SVs for which the provenance of 2018 samples  
253 could be predicted using 2017 samples as training with performances that were similar  
254 to the cross validation expected value on a single year. Interestingly, the predictive SVs  
255 belonged to a limited number of taxa both for Bacteria and Fungi. Indeed, while 44/150  
256 predictive bacterial SV could not be classified at the Genus level, the remaining 106  
257 spanned only 13 Genera, including *Spartobacteria incertae sedis*, *Nitrososphaera*, *Gp6*,  
258 and *GP16*, which were represented by more than 10 SVs each. Of these, only SVs from  
259 *Spartobacteria incertae sedis* were discriminant for all sites. For Fungi, 28/100  
260 predictive SVs belonged to the Genus *Mortierella*, which was also the only Genus that  
261 had predictive SVs for all locations.

262

263

## 264 Discussion

265 In the last few years we have witnessed an increasing number of studies that use high  
266 throughput sequencing and culture-free approaches to study the composition of

267 microbial communities in a variety of environments on a global scale. Thanks to this  
268 wealth of new data, we are starting to understand the major ecological drivers of  
269 microbial diversity and we have been able to greatly expand the census of known  
270 microbial species. The vast majority of the available data are from cross-sectional study  
271 designs, where environments are sampled across conditions at a given time. Much less  
272 experimental effort has been devoted to characterizing the stability of the microbiota  
273 over time, and how the variability due to sampling over different years time compares to  
274 other factors, like, in the case of soil, geography or land use. Soil bacterial communities  
275 have been shown to undergo significant shifts when sampling is repeated in different  
276 months within a year [15][35] In another study sampling contrasting seasons on a large  
277 spatial scale in wheat croplands across North China Plain, it was found that spatial  
278 variability was larger than temporal variability both for bacteria and fungi [16]. Inter-  
279 annual rates of community turnover have been shown to be much smaller than  
280 seasonal changes for fungi [36]. Here, we have sampled soil microbial communities in  
281 ten locations, in sites with three distinct land managements in each location, over two  
282 consecutive years.

283 Previously we found that the variability of fungal communities patterns were qualitatively  
284 different from what was found for bacteria. Despite the relatively limited geographical  
285 range sampled, these results were in striking agreement with the dominant role of a  
286 small number of taxa, in particular from the phylum Ascomycota [9]. Further, we found  
287 that geographical location, but not land use, had an impact on determining the size of  
288 the core soil mycobiome, indicating the importance of spatial processes in structuring  
289 the biogeographic pattern of soil fungal communities [17].

290 In this work we explored the effect of different years and studied how the year-to-year  
291 variability compares with other factors. We found that both for bacteria and fungi the  
292 differences due to different years were smaller than the differences due to land  
293 management or geographical location. These results show that, while vintage can  
294 cause significant shifts in grape microbiota even within small geographical scales [14],  
295 the soil microbiota of single vineyards is stable across consecutive years, probably due  
296 to the weaker influence of climate on bulk soil than on the more exposed grape surface.  
297 Comparing the species richness in the same site between two consecutive years, we  
298 found that there was a systematic difference in bacterial species richness and  
299 phylogenetic diversity that were consistently higher in 2018 samples regardless of  
300 location or land management, while for fungi we found that species richness and  
301 phylogenetic diversity changed in a site-dependent fashion. We found a general  
302 increase in Shannon entropy and Simpson diversity index for Fungi, indicating a  
303 decreasing role of the dominant species in the structure of the soil mycobiota in 2018  
304 compared to 2017. Comparing meteorological data for the two years, we found that  
305 2018 before the sampling date was characterized by a higher amount of accumulated  
306 rain compared to 2017. Few data exist regarding the relation between annual amount of  
307 rain and soil microbial richness and diversity, and most existing data report the effects  
308 of extreme phenomena, like drought or flooding [37]. In a global survey of the topsoil  
309 microbiota, Bahram et al. found that bacterial taxonomic diversity was negatively  
310 correlated with the mean annual amount of rain, while an inverse relation was found for  
311 fungi [3]. However, these data were obtained comparing samples from different  
312 locations, opening the possibility that these relations are due to general differences

313 between wet and dry environments, and not to the effect of climatic variables alone.  
314 Here, by comparing two consecutive years in the same set of locations, we highlight  
315 the effects of yearly climate differences on soil microbiota. Our results might thus  
316 indicate a possible scenario in the case of short term climate change.  
317 When we looked in detail at the composition of the yearly variable bacterial species, we  
318 found that these were mainly composed by rare taxa, *i.e.* taxa with low relative  
319 abundances, while the abundance distribution of yearly variable fungal species was  
320 similar to the abundance distribution of permanent species. Rare taxa are an integral  
321 component of microbial communities, that often display a long tail of low abundance  
322 species [38] , and constitute a reservoir of microbial diversity that responds to  
323 environmental changes, thus contributing in an essential way to the dynamics of  
324 microbial communities [39] . Here, we found that a higher number of rare bacterial taxa  
325 were detected in 2018 compared to 2017, probably due to taxa that were below  
326 detection limit in samples from 2017, and that, due to different environmental conditions,  
327 grew in relative abundance in 2018. Interestingly, we found that the number of year-  
328 specific SVs was much lower than that of SVs that were conserved across years in  
329 *Acidobacteria* and *Actinobacteria*, the two Phyla with highest relative abundance, while  
330 was comparable or higher than that of SVs conserved across years for less abundant  
331 Phyla, like *Proteobacteria* and *Planctomycetales*.  
332 For fungi, the situation was different. The fungal component of the microbiota had a  
333 simpler structure, with a smaller number of SVs than bacteria (compare, e.g., the values  
334 of the Chao1 estimator of species richness for Bacteria and Fungi, Figures 2a and 4a)  
335 and a higher spatial variability over short scales and temporal variability, as shown *e.g.*



336 by the different scales in the distance distributions for bacteria and fungi (Figure 5), and  
337 the higher relative abundances of year-specific SVs for fungi compared to bacteria,  
338 (Figure 3). Thus, the role of stochastic fluctuations appears to be higher for Fungi than  
339 for Bacteria, with a more prominent role of temporal and spatial fluctuations, probably  
340 due to the lower complexity of soil fungal communities compared to bacterial  
341 communities.

342 A machine learning approach showed that a classifier trained over 2017 samples were  
343 able to correctly classify samples from the following year both using Bacterial and  
344 Fungal relative abundance data, showing that the soil microbiota has characteristics  
345 specific of the sampling location that are stable over consecutive years. Ranking SVs by  
346 their contribution to the classification, we found that predictive SVs belonged to a small  
347 number of Bacterial and Fungal genera, among which the most common were  
348 *Spartobacteria genera incertae sedis* and *Nitrososphaera* for Bacteria, and *Mortierella*  
349 for Fungi. *Spartobacteria* are a class of poorly characterized *Verrucomicrobia* that are  
350 highly abundant and ubiquitous in soil [40], particularly in grasslands where they appear  
351 to be well adapted to limited nutrient availability [41]. Species belonging to  
352 *Spartobacteria* have been found to be indicator species in acidoneutral Antarctic soils  
353 [42]. Abundance of *Spartobacteria* has been shown to increase with elevation in pasture  
354 soils in the Central European Alps [43]. Relative abundance of *Spartobacteria genera*  
355 *incertae sedis* in the rhizosphere has been found to positively correlate with plant  
356 growth in replanted apple orchards [44]. *Nitrososphaera* is a genus of *Archaea* that has  
357 been found at high relative abundance in vineyards soils and that contribute to nitrogen  
358 transformation [45]. *Mortierella* is a genus from Phylum *Zygomycota* that includes

359 species of saprotrophs that live in soil. Members of this genus have been shown to be  
360 ubiquitous and present at high relative abundances in surveys of vineyard soils [46,47].  
361 There are a few technical issues that might impact the results presented here. In  
362 particular, the presence of relic DNA has been shown to artificially inflate the estimated  
363 diversity (Carini et al. 2016). Although the effect of relic DNA on richness can act in  
364 either way depending on the dynamics of DNA degradation and has little effect on beta  
365 diversity [48], it is reasonable to expect that it can reduce the size of temporal  
366 fluctuations in soil microbial communities [49], thus dampening the year-to-year  
367 variability found in soil samples if the species abundance distribution is different  
368 between the two years [48]. For this reason, we expect that the systematic differences  
369 that we found between 2018 and 2017 samples are an underestimate of the real  
370 variations, and that further extension of the sampling on multiple years will help  
371 elucidate the impact of climate fluctuations on soil microbial communities.  
372 It has been suggested that soil microbial communities are a reservoir of grape  
373 microbiota [14], and that vineyard soil microbiota could have an impact on wine  
374 fermentation [10]. It has also been shown that regional varieties of yeasts strongly  
375 contribute to wine regional characteristics [11], laying the base for the definition of a  
376 microbial terroir [50]. In order to contribute to the regional diversity of wine, the soil  
377 microbiota should be stable across different years, and the temporal variability should  
378 not be so large to wipe out the differences between different sites. We have shown that  
379 differences between consecutive years are smaller than those due to geographical  
380 factors even at short length scale, and that the structure of the soil microbiota is a  
381 signature of the geographical origin of the sample. Using a predictive model, we have

382 shown that these site-specific features of the soil microbiota are stable across years,  
383 putting the concept of microbial terroir on a firmer ground.

384

385

## 386 Materials and Methods

### 387 Sample collection

388 The sampling sites were identified in 10 vineyards from 4 different locations (Ala,  
389 Besagno, Mori and S. Felice) because of their contiguity, at least along 20 meters, to  
390 perennial crop-covered surfaces. The experimental protocol set 3 sampling points  
391 respectively between the rows (V) and in the perennial crop area at a distance of 8 (P1)  
392 and 16 (P2) meters from the border of the vineyard [20]. Sampling was conducted in  
393 two consecutive years (2017 and 2018) in the same season (Supplementary Table 1).

394 The dominant grass species in V sites were species belonging to the Poaceae family,  
395 while in P1 and P2 sites the dominant species were *Arrhenatherum elatius*, *Bromus*  
396 *erectus* and *Trisetum flavescens*. For each position 6 equally spaced sampling  
397 repetitions were performed, for a total of 180 samples for each sampling year.

398 Supplementary table 2 shows sites localization and technical characteristics of the  
399 vineyards (planting year, previous crop). All samples had a similar range of soil texture  
400 (loam, sandy clay loam, sandy loam and silty loam, see Supplementary Fig S1 ).

401 Quantity of soil organic matter (SOM), total nitrogen, total carbonate, and heavy metals  
402 (Cu and Zn) are reported in Supplementary Table 3. Samplings were executed

403 collecting 20 cm of soil by means of a manual, one-piece, 7 cm diameter drill for loamy  
404 soils (Eijkelkamp, Edelman model). For chemical analysis and for taxonomic purposes  
405 of bulk soil the first 5 cm of soil were removed. Each sample consisted of 4 drillings that  
406 were homogenized in a signed plastic bag. From every one of them, a small volume of  
407 soil was collected in a 50 ml tube and chilled to 6/8°C during the sampling time after  
408 which they were frozen at -18°C.

### 409 DNA extraction, library preparation and sequencing

410 The soil samples were freeze-dried and sieved with a 0.2 mm mesh size and stored at  
411 -80 °C until DNA extraction. Total DNA was extracted from 0.25 g of each composite  
412 soil sample using the PowerSoil DNA isolation kit (MO BIO Laboratories Inc., CA, USA)  
413 according to the manufacturer's instructions. Total genomic DNA was amplified using  
414 primers specific to either the bacterial and archaeal 16S rRNA gene or the fungal ITS1  
415 region. The specific bacterial primer set 515F (5'-GTGYCAGCMGCCGCGGTAA-3') and  
416 the 806R (5'-GGACTACNVGGGTWTCTAAT-3') was used [21] with degenerate bases  
417 suggested by [22] and [23]. Although no approach based on PCR amplification is free  
418 from bias, this primer pair has been shown to guarantee good coverage of known  
419 bacterial and archaeal taxa [24]. For the identification of fungi, the internal transcribed  
420 spacer 1 (ITS1) was amplified using the primer ITS1F (5'-  
421 CTTGGTCATTTAGAGGAAGTAA-3') [19] and ITS2 (5'-GCTGCGTTCTTCATCGATGC-  
422 3') [25]. All the primers included the specific overhang Illumina adapters for the  
423 amplicon library construction.

424 For the 16S V4 region each sample was amplified by PCR using 25 µl reaction with 1

425  $\mu\text{M}$  of each primer. More in detail, 12.5  $\mu\text{l}$  of 2x KAPA HiFi HotStart ReadyMix and 10  $\mu\text{l}$   
426 forward and reverse primers, were used in combination with 2,5  $\mu\text{l}$  of template DNA (5-  
427 20 ng/ $\mu\text{l}$ ). PCR reactions were executed by GeneAmp PCR System 9700 (Thermo  
428 Fisher Scientific) and the following cycling conditions: initial denaturation step at 95  $^{\circ}\text{C}$   
429 for 5 minutes (one cycle); 28 cycles at 95  $^{\circ}\text{C}$  for 30 seconds, 55  $^{\circ}\text{C}$  for 30 seconds, 72  
430  $^{\circ}\text{C}$  for 30 seconds; final extension step at 72  $^{\circ}\text{C}$  for 5 minutes (1 cycle).

431 For the ITS1 region each sample was amplified by PCR using 25 $\mu\text{l}$  reaction with 10  $\mu\text{M}$   
432 of each primer. More in detail 22  $\mu\text{l}$  of premix FastStart High Fidelity PCR System  
433 (Roche) and 2 $\mu\text{l}$  forward and reverse primers, were used in combination with 1  $\mu\text{l}$  of  
434 template DNA (5-20 ng/ $\mu\text{l}$ ). PCR reactions were executed by GeneAmp PCR System  
435 9700 (Thermo Fisher Scientific) and the following cycling conditions: initial denaturation  
436 step at 95  $^{\circ}\text{C}$  for 3 minutes (one cycle); 30 cycles at 95  $^{\circ}\text{C}$  for 20 seconds, 50  $^{\circ}\text{C}$  for 45  
437 seconds, 72  $^{\circ}\text{C}$  for 90 seconds; final extension step at 72  $^{\circ}\text{C}$  for 10 minutes (1 cycle).

438 The amplification products were checked on 1.5 % agarose gel and purified using the  
439 Agencourt AMPure XP system (Beckman Coulter, Brea, CA, USA), following the  
440 manufacturer's instructions. Afterward, a second PCR was used to apply dual indices  
441 and Illumina sequencing adapters Nextera XT Index Primer (Illumina), by 7 cycles PCR  
442 (16S Metagenomic Sequencing Library Preparation, Illumina). The amplicon libraries  
443 were purified using Agencourt using the Agencourt AMPure XP system (Beckman), and  
444 the quality control was performed on a TapeStation 2200 platform (Agilent  
445 Technologies, Santa Clara, CA, USA). Finally, all barcoded libraries were pooled in an  
446 equimolar way and sequenced on an Illumina® MiSeq (PE300) platform (MiSeq Control  
447 Software 2.5.0.5 and Real-Time Analysis software 1.18.54.0).

## 448 Bioinformatic processing of the sequences.

449 The sequences were assigned to samples using sample-specific barcodes and saved in  
450 FASTQ-formatted files. Sequences were deposited to the European Nucleotide Archive  
451 (ENA) with study accession PRJEB31356. Raw data FASTQ files were analyzed using  
452 the software pipeline MICCA [26] v. 1.7.2.

453 Raw overlapping 16S paired-end reads were assembled (merged) using the procedure  
454 described in [27]. Paired-end reads with an overlap length smaller than 200 bp and with  
455 more than 50 mismatches were discarded. After trimming forward and reverse primers,  
456 merged reads shorter than 250 bp and with an expected error rate higher than 0.5%  
457 were removed.

458 Filtered sequences were clustered into sequence variants (SVs) using the UNOISE3  
459 denoising algorithm available in MICCA. OTUs were taxonomically classified using the  
460 Ribosomal Database Project (RDP) Classifier [28] v2.11. Multiple sequence alignment  
461 (MSA) was performed on the denoised reads applying the Nearest Alignment Space  
462 Termination (NAST) [26,29] algorithm and the phylogenetic tree was inferred using  
463 FastTree [30] (v2.1.8).

464 Raw overlapping ITS paired-end reads were merged and merged sequences with an  
465 overlap length smaller than 100 bp and with more than 32 mismatches were discarded.  
466 After primers trimming, merged reads shorter than 150 bp and with an expected error  
467 rate higher than 0.5% were removed. Filtered sequences were clustered into SVs using  
468 the UNOISE3 denoising algorithm and SVs were taxonomically classified using the  
469 RDP Classifier v2.11 and the UNITE [31] database. To compensate for different  
470 sequencing depths, samples were rarefied to an even depth of 15,000 reads for both

471 16S and ITS sequences. Samples with less than the minimum number of reads were  
472 discarded. Prior to rarefaction, sequencing reads from control runs (see section on  
473 Technical replicates) were merged with actual runs for those samples that were  
474 sequenced multiple times. Since P2 sampling sites of neighbouring PT05 and PT15  
475 sites coincide, a single sequencing run was used for both PT05 and PT15 sites in  
476 diversity and distance calculations. These samples were not considered in the training  
477 and validation of the SVM classifiers.

## 478 Technical replicates

479 Soil samples from 2017 and 2018 were sequenced in different times in several  
480 sequencing runs. To exclude that batch effects could affect our estimates of the  
481 differences between the richness and composition of the soil microbiota in the two  
482 different years, and of the relative importance of time, sampling site, and land use, we  
483 resequenced 10 samples from 2017 and 10 from 2018, one for each location, in a single  
484 sequencing run (hereinafter, for brevity, “control run”), and compared alpha and beta  
485 diversity indexes between these control samples and the corresponding actual samples.  
486 We found (see Supplementary Material) that there was a good degree of correlation  
487 between observed number of SVs, Chao1 estimator of species richness, Shannon  
488 entropy and Simpson diversity index in control and actual samples for Bacteria, and, to  
489 a lower degree due to higher sensitivity to rarefaction, for fungi. For beta diversity, the  
490 Bray Curtis dissimilarities between pairs of actual samples were always highly  
491 correlated with the dissimilarities between corresponding pairs of control samples, with  
492 minimal variance introduced by rarefaction.

## 493 Statistical analysis of the data.

494 Biom files and rooted phylogenetic trees (used in the calculation of beta diversity) were  
495 imported into R v4.0.0 using the *phyloseq* package [32] v1.32.0 for downstream  
496 statistical analysis. Alpha diversity was calculated using the Chao1 estimator [33] and  
497 the Shannon entropy [34]. Generalized linear models for alpha diversity were  
498 determined using the *glm* function in R. Contrasts were calculated using the package  
499 *emmeans* v1.5.3. Beta-diversity was calculated using the Bray Curtis distance.

500 Linear kernel Support Vector Machines encoded the LiblineaR v2.10-8 software  
501 package were trained using the R package mlr3 v0.8.0 through the mlr3extralearners  
502 v0.1.0 interface. Classification Accuracy was estimated by 50 folds cross validation by  
503 random splitting the dataset in 2/3 training and 1/3 test set. Tuning of the C parameter  
504 of the SVM was accomplished in each iteration using an inner 3-fold cross validation  
505 loop. Parameter search space was C=0.01,0.1,1,10,100,1000.

## 506 Meteorological data

507 Meteorological data from the sampling areas were recorded daily in four stations  
508 located in close proximity of the vineyards ( see Supplementary Informations). Based on  
509 location, the association between meteorological stations and sampling locations was  
510 as follows: Station 1 - Part05, Part09, Part12, Part15; Station2 - Part03, Part11, Part16,  
511 Part17; Station 3 - Part13; Station 4 - Part01.

## 512 Availability of data and material

513 Raw sequencing data along with geographical and physico-chemical information are



514 available at the European Nucleotide Archive (<https://www.ebi.ac.uk/ena>) under the  
515 study id PRJEB31356. Meteorological data are available as supplementary material.

516

## 517 Acknowledgements

518 The meteorological data were kindly provided by "Unità Agrometeorologia e Sistemi  
519 Informatici" of the Edmund Mach Foundation (<https://meteo.fmach.it/>); furthermore  
520 authors would also thanks the "Consorzio vini del Trentino"  
521 (<https://www.vinideltrentino.com/>) for the sampling sites availability.

522 Authors' contributions

523 AC: Conceptualization. Resources. Writing - original draft. Writing - review and editing.

524 Data curation.

525 EC: Conceptualization. Resources. Writing – review and editing.

526 DA: Formal analysis. Data curation. Software. Writing – review and editing.

527 ES: Investigation.

528 MP: Investigation. Resources.

529 CI: Writing – review and editing.

530 RZ: Investigation. Writing – review and editing.

531 CD: Conceptualization. Resources. Supervision. Formal analysis. Writing – original  
532 draft. Writing – review and editing.

533

## 534 References

- 535 1. Fierer N. Embracing the unknown: disentangling the complexities of the soil microbiome. *Nat*  
536 *Rev Microbiol.* Nature Publishing Group; 2017;15:579–90.
- 537 2. Bar-On YM, Phillips R, Milo R. The biomass distribution on Earth [Internet]. *Proceedings of*  
538 *the National Academy of Sciences.* 2018. p. 6506–11. Available from:  
539 <http://dx.doi.org/10.1073/pnas.1711842115>
- 540 3. Bahram M, Hildebrand F, Forslund SK, Anderson JL, Soudzilovskaia NA, Bodegom PM, et al.  
541 Structure and function of the global topsoil microbiome. *Nature.* 2018;560:233–7.
- 542 4. Cameron EK, Martins IS, Lavelle P, Mathieu J, Tedersoo L, Gottschall F, et al. Global gaps in  
543 soil biodiversity data. *Nat Ecol Evol.* 2018;2:1042–3.
- 544 5. Thompson LR, Sanders JG, McDonald D, Amir A, Ladau J, Locey KJ, et al. A communal  
545 catalogue reveals Earth’s multiscale microbial diversity. *Nature.* 2017;551:457–63.
- 546 6. Chu H, Gao G-F, Ma Y, Fan K, Delgado-Baquerizo M. Soil Microbial Biogeography in a  
547 Changing World: Recent Advances and Future Perspectives. *mSystems* [Internet]. 2020;5.  
548 Available from: <http://dx.doi.org/10.1128/mSystems.00803-19>
- 549 7. Delgado-Baquerizo M, Oliverio AM, Brewer TE, Benavent-González A, Eldridge DJ, Bardgett  
550 RD, et al. A global atlas of the dominant bacteria found in soil. *Science.* 2018;359:320–5.
- 551 8. Meiser A, Bálint M, Schmitt I. Meta-analysis of deep-sequenced fungal communities indicates  
552 limited taxon sharing between studies and the presence of biogeographic patterns. *New Phytol.*

- 553 2014;201:623–35.
- 554 9. Egidi E, Delgado-Baquerizo M, Plett JM, Wang J, Eldridge DJ, Bardgett RD, et al. A few  
555 Ascomycota taxa dominate soil fungal communities worldwide. *Nat Commun.* 2019;10:2369.
- 556 10. Stefanini I, Cavalieri D. Metagenomic Approaches to Investigate the Contribution of the  
557 Vineyard Environment to the Quality of Wine Fermentation: Potentials and Difficulties. *Front*  
558 *Microbiol.* 2018;9:991.
- 559 11. Knight S, Klaere S, Fedrizzi B, Goddard MR. Regional microbial signatures positively  
560 correlate with differential wine phenotypes: evidence for a microbial aspect to terroir. *Sci Rep.*  
561 2015;5:14233.
- 562 12. Bokulich NA, Collins TS, Masarweh C, Allen G, Heymann H, Ebeler SE, et al. Associations  
563 among Wine Grape Microbiome, Metabolome, and Fermentation Behavior Suggest Microbial  
564 Contribution to Regional Wine Characteristics. *MBio* [Internet]. 2016;7. Available from:  
565 <http://dx.doi.org/10.1128/mBio.00631-16>
- 566 13. Belda I, Zorraonaindia I, Perisin M, Palacios A, Acedo A. From Vineyard Soil to Wine  
567 Fermentation: Microbiome Approximations to Explain the " Concept. *Front Microbiol.*  
568 2017;8:821.
- 569 14. Bokulich NA, Thorngate JH, Richardson PM, Mills DA. PNAS Plus: From the Cover:  
570 Microbial biogeography of wine grapes is conditioned by cultivar, vintage, and climate [Internet].  
571 *Proceedings of the National Academy of Sciences.* 2014. p. E139–48. Available from:  
572 <http://dx.doi.org/10.1073/pnas.1317377110>
- 573 15. Lauber CL, Ramirez KS, Aanderud Z, Lennon J, Fierer N. Temporal variability in soil  
574 microbial communities across land-use types [Internet]. *The ISME Journal.* 2013. p. 1641–50.  
575 Available from: <http://dx.doi.org/10.1038/ismej.2013.50>

- 576 16. Zhang K, Delgado-Baquerizo M, Zhu Y-G, Chu H. Space Is More Important than Season  
577 when Shaping Soil Microbial Communities at a Large Spatial Scale. *mSystems* [Internet].  
578 2020;5. Available from: <http://dx.doi.org/10.1128/mSystems.00783-19>
- 579 17. Tatti E, Decorosi F, Viti C, Giovannetti L. Despite long-term compost amendment seasonal  
580 changes are main drivers of soil fungal and bacterial population dynamics in a Tuscan vineyard.  
581 *Geomicrobiol J*. Informa UK Limited; 2012;29:506–19.
- 582 18. Corneo PE, Pellegrini A, Cappellin L, Roncador M, Chierici M, Gessler C, et al. Microbial  
583 community structure in vineyard soils across altitudinal gradients and in different seasons.  
584 *FEMS Microbiol Ecol*. 2013;84:588–602.
- 585 19. Gardes M, Bruns TD. ITS primers with enhanced specificity for basidiomycetes--application  
586 to the identification of mycorrhizae and rusts. *Mol Ecol*. 1993;2:113–8.
- 587 20. Coller E, Cestaro A, Zanzotti R, Bertoldi D, Pindo M, Larger S, et al. Microbiome of vineyard  
588 soils is shaped by geography and management. *Microbiome*. 2019;7:140.
- 589 21. Caporaso JG, Lauber CL, Walters WA, Berg-Lyons D, Lozupone CA, Turnbaugh PJ, et al.  
590 Global patterns of 16S rRNA diversity at a depth of millions of sequences per sample. *Proc Natl*  
591 *Acad Sci U S A*. 2011;108 Suppl 1:4516–22.
- 592 22. Apprill A, McNally S, Parsons R, Weber L. Minor revision to V4 region SSU rRNA 806R  
593 gene primer greatly increases detection of SAR11 bacterioplankton. *Aquat Microb Ecol*.  
594 2015;75:129–37.
- 595 23. Parada AE, Needham DM, Fuhrman JA. Every base matters: assessing small subunit rRNA  
596 primers for marine microbiomes with mock communities, time series and global field samples.  
597 *Environ Microbiol*. 2016;18:1403–14.

- 598 24. Walters W, Hyde ER, Berg-Lyons D, Ackermann G, Humphrey G, Parada A, et al. Improved  
599 Bacterial 16S rRNA Gene (V4 and V4-5) and Fungal Internal Transcribed Spacer Marker Gene  
600 Primers for Microbial Community Surveys. *mSystems* [Internet]. 2016;1. Available from:  
601 <http://dx.doi.org/10.1128/mSystems.00009-15>
- 602 25. White TJ, Bruns T, Lee S, Taylor J. 38 - AMPLIFICATION AND DIRECT SEQUENCING OF  
603 FUNGAL RIBOSOMAL RNA GENES FOR PHYLOGENETICS. In: Innis MA, Gelfand DH,  
604 Sninsky JJ, White TJ, editors. *PCR Protocols*. San Diego: Academic Press; 1990. p. 315–22.
- 605 26. Albanese D, Fontana P, De Filippo C, Cavalieri D, Donati C. MICCA: a complete and  
606 accurate software for taxonomic profiling of metagenomic data. *Sci Rep*. 2015;5:9743.
- 607 27. Edgar RC, Flyvbjerg H. Error filtering, pair assembly and error correction for next-generation  
608 sequencing reads. *Bioinformatics*. 2015;31:3476–82.
- 609 28. Wang Q, Garrity GM, Tiedje JM, Cole JR. Naive Bayesian classifier for rapid assignment of  
610 rRNA sequences into the new bacterial taxonomy. *Appl Environ Microbiol*. 2007;73:5261–7.
- 611 29. DeSantis TZ Jr, Hugenholtz P, Keller K, Brodie EL, Larsen N, Piceno YM, et al. NAST: a  
612 multiple sequence alignment server for comparative analysis of 16S rRNA genes. *Nucleic Acids*  
613 *Res*. 2006;34:W394–9.
- 614 30. Price MN, Dehal PS, Arkin AP. FastTree 2--approximately maximum-likelihood trees for  
615 large alignments. *PLoS One*. 2010;5:e9490.
- 616 31. Kõljalg U, Larsson K-H, Abarenkov K, Nilsson RH, Alexander IJ, Eberhardt U, et al. UNITE:  
617 a database providing web-based methods for the molecular identification of ectomycorrhizal  
618 fungi. *New Phytol*. 2005;166:1063–8.
- 619 32. McMurdie PJ, Holmes S. phyloseq: an R package for reproducible interactive analysis and

- 620 graphics of microbiome census data. PLoS One. 2013;8:e61217.
- 621 33. Chao A. Non-parametric estimation of the classes in a population. Scand J Statist.  
622 1984;265–70.
- 623 34. Shannon CE. A Mathematical Theory of Communication. Bell System Technical Journal.  
624 1948;27:379–423.
- 625 35. Uksa M, Fischer D, Welzl G, Kautz T, Köpke U, Schloter M. Community structure of  
626 prokaryotes and their functional potential in subsoils is more affected by spatial heterogeneity  
627 than by temporal variations. Soil Biol Biochem. 2014;75:197–201.
- 628 36. Averill C, Cates LL, Dietze MC, Bhatnagar JM. Spatial vs. temporal controls over soil fungal  
629 community similarity at continental and global scales. ISME J. 2019;13:2082–93.
- 630 37. Jansson JK, Hofmockel KS. Soil microbiomes and climate change. Nat Rev Microbiol.  
631 Nature Publishing Group; 2019;18:35–46.
- 632 38. Lynch MDJ, Neufeld JD. Ecology and exploration of the rare biosphere. Nat Rev Microbiol.  
633 2015;13:217–29.
- 634 39. Shade A, Jones SE, Caporaso JG, Handelsman J, Knight R, Fierer N, et al. Conditionally  
635 rare taxa disproportionately contribute to temporal changes in microbial diversity. MBio.  
636 2014;5:e01371–14.
- 637 40. Brewer TE, Handley KM, Carini P, Gilbert JA, Fierer N. Genome reduction in an abundant  
638 and ubiquitous soil bacterium “*Candidatus Udaeobacter copiosus*.” Nat Microbiol. 2016;2:16198.
- 639 41. Fierer N, Ladau J, Clemente JC, Leff JW, Owens SM, Pollard KS, et al. Reconstructing the  
640 microbial diversity and function of pre-agricultural tallgrass prairie soils in the United States.  
641 Science. 2013;342:621–4.

- 642 42. Malard LA, Anwar MZ, Jacobsen CS, Pearce DA. Biogeographical patterns in soil bacterial  
643 communities across the Arctic region. *FEMS Microbiol Ecol* [Internet]. 2019;95. Available from:  
644 <http://dx.doi.org/10.1093/femsec/fiz128>
- 645 43. Praeg N, Seeber J, Leitinger G, Tasser E, Newesely C, Tappeiner U, et al. The role of land  
646 management and elevation in shaping soil microbial communities: Insights from the Central  
647 European Alps. *Soil Biol Biochem*. 2020;150:107951.
- 648 44. Franke-Whittle IH, Manici LM, Insam H, Stres B. Rhizosphere bacteria and fungi associated  
649 with plant growth in soils of three replanted apple orchards. *Plant Soil*. 2015;395:317–33.
- 650 45. Liang H, Wang X, Yan J, Luo L. Characterizing the Intra-Vineyard Variation of Soil Bacterial  
651 and Fungal Communities. *Front Microbiol*. 2019;10:1239.
- 652 46. Gobbi A, Acedo A, Imam N, Santini RG, Ortiz-Álvarez R, Ellegaard-Jensen L, et al.  
653 Microbial map of the world's vineyards: Applying the concept of microbial terroir on a global  
654 scale [Internet]. Cold Spring Harbor Laboratory. 2020 [cited 2020 Nov 13]. p.  
655 2020.09.25.313288. Available from:  
656 <https://www.biorxiv.org/content/10.1101/2020.09.25.313288v1>
- 657 47. Liu D, Chen Q, Zhang P, Chen D, Howell KS. The Fungal Microbiome Is an Important  
658 Component of Vineyard Ecosystems and Correlates with Regional Distinctiveness of Wine.  
659 *mSphere* [Internet]. 2020;5. Available from: <http://dx.doi.org/10.1128/mSphere.00534-20>
- 660 48. Lennon JT, Muscarella ME, Placella SA, Lehmkuhl BK. How, When, and Where Relic DNA  
661 Affects Microbial Diversity. *MBio* [Internet]. 2018;9. Available from:  
662 <http://dx.doi.org/10.1128/mBio.00637-18>
- 663 49. Carini P, Marsden PJ, Leff JW, Morgan EE, Strickland MS, Fierer N. Relic DNA is abundant  
664 in soil and obscures estimates of soil microbial diversity. *Nat Microbiol*. 2016;2:16242.



665 50. Gilbert JA, van der Lelie D, Zarraonaindia I. Microbial terroir for wine grapes. Proc. Natl.  
666 Acad. Sci. U. S. A. 2014. p. 5–6.

667

668 **Figures**

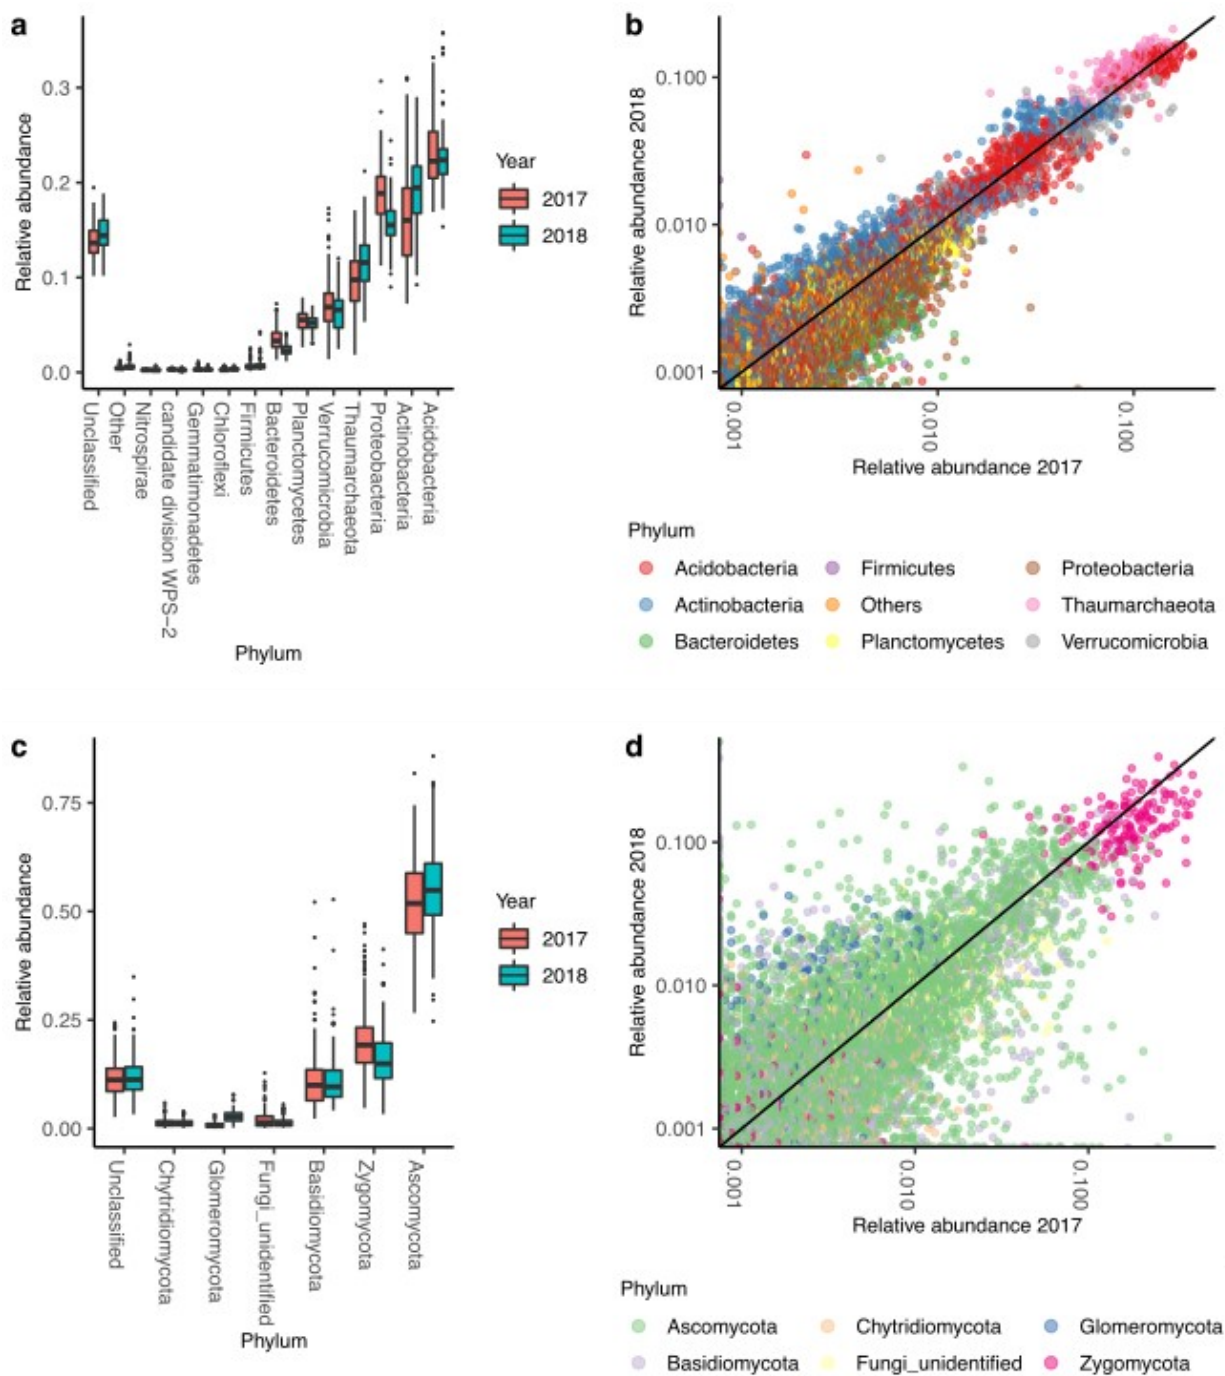

669

670 **Figure 1.** a) Relative abundance of most abundant bacterial phyla in two consecutive  
671 years. b) scatter plot of the relative abundances of bacterial SVs in 2018 vs 2017. Each  
672 dot represents a bacterial genus in a given site, and horizontal and vertical coordinates  
673 are the relative abundances in 2017 and 2018, respectively. The straight line is the  
674 bisectrix of the first quadrant. c) same as a), for fungi. d) same as b), for fungi.  
675

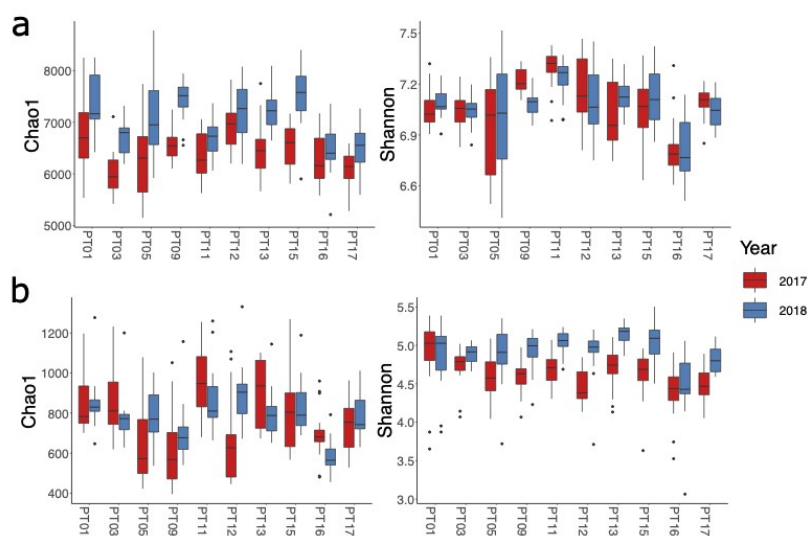

676  
677 **Figure 2.** Richness and diversity of the bacterial a) and fungal b) components of the  
678 microbiota.  
679

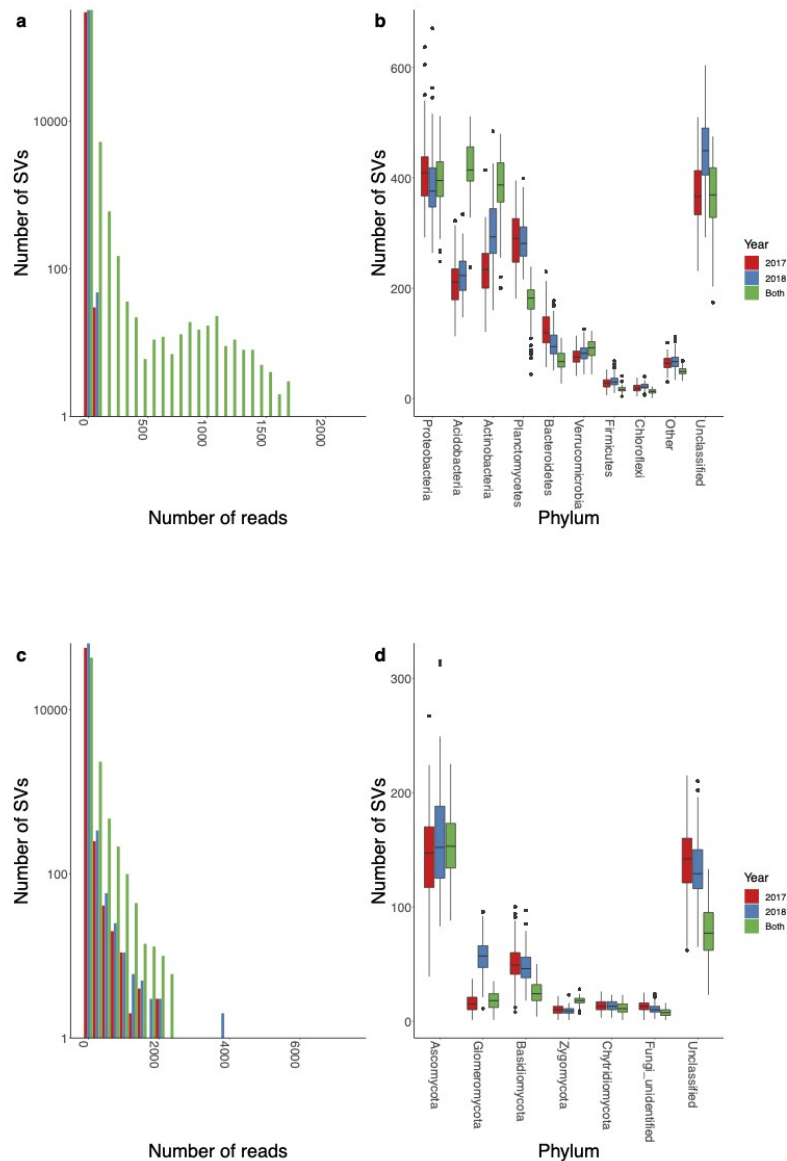

680

681 **Figure 3.** a) Number of bacterial SVs that, in a given site, were present only in one of  
682 the two years or in both, stratified by phylum. b) Number of bacterial SVs that, in a given  
683 site, were present only in one of the two years or in both, as a function of their  
684 abundance. c), d) Same as a), b), for fungi.

685

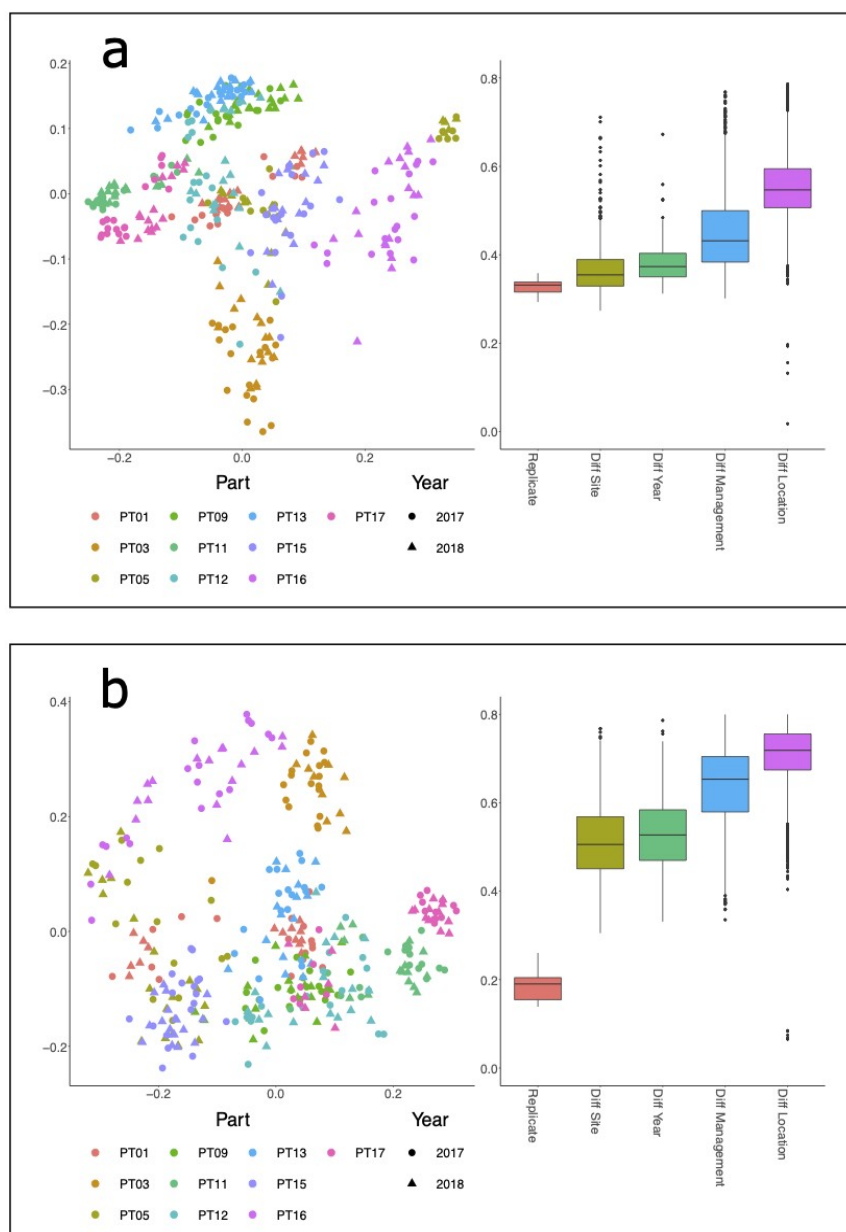

686

687 **Figure 4.** a) Left panel:PCoA of the Bray-Curtis dissimilarity for bacteria; Right panel:

688 boxplots of the between-samples Bray-Curtis dissimilarities between pairs of samples

689 for bacteria. In all comparisons only one factor is different, while all others are held

690 constant. b) same as a), for fungi.

691

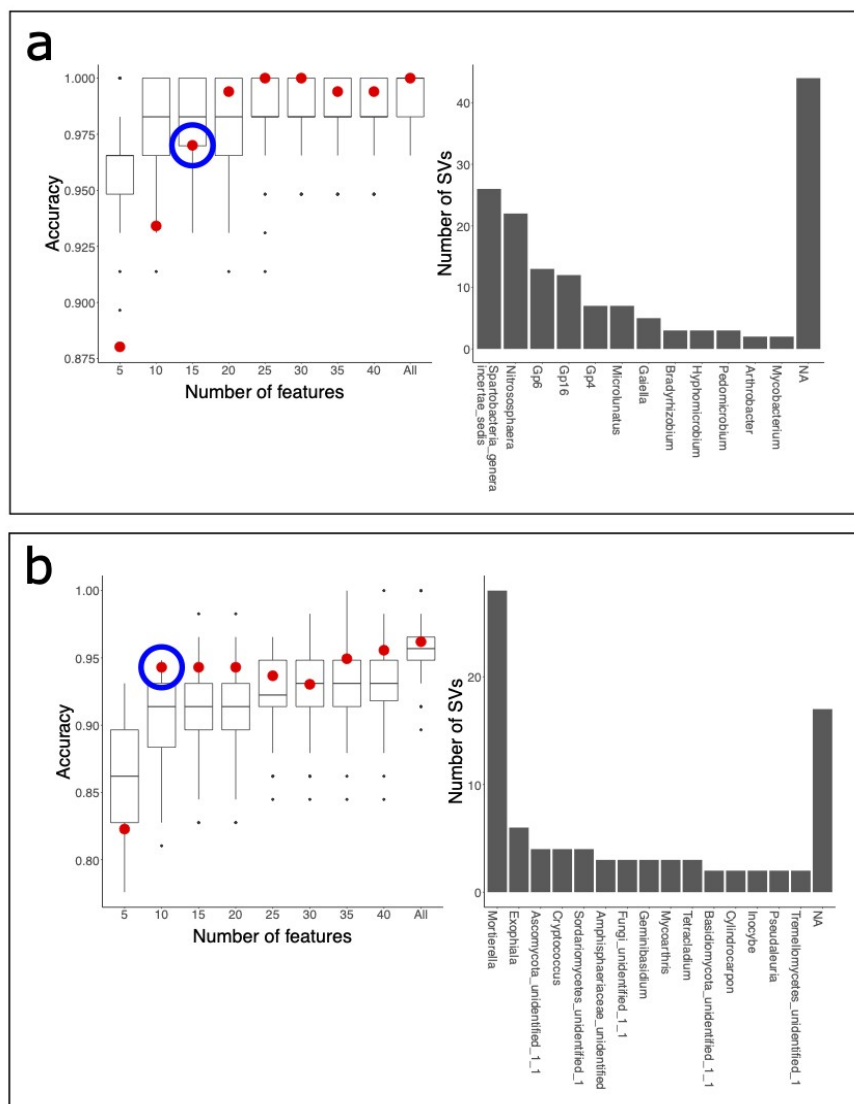

692

693 **Figure 5.** a) Left panel: Red dots are the prediction accuracy on the 2018 samples by a  
694 SVM trained over 2017 samples as a function of the number of selected bacterial SVs  
695 per site. The boxes are the cross-validation expected value of the accuracy of the SVM  
696 over the 2017 samples. The blue circle marks the minimal number of features that are  
697 needed for a 2018 prediction with an accuracy similar to the 2017 cross validation  
698 value. Right panel: Number of predictive SVs (corresponding to the blue dot in the left

699 panel) classified at the Genus level. Only genera with at least two predictive SVs are  
700 shown. b) Same as a), for Fungi.
